# Supplementary material for: Modeling the Impact of Antibiotic Exposure on Human Microbiota
Source: PubMed Central journal article supplement — Sci Rep. 2014 Mar 11;4:4345. doi: 10.1038/srep04345 (PMC3949250; doi:10.1038/srep04345), 2014-03-11
Supplement: srep04345-s1.pdf [file srep04345-s1.pdf]

# Modeling the Impact of Antibiotic Exposure on Human Microbiota

Jiangchao Zhao, Susan Murray, John J. LiPuma

## Supplementary Materials:

Figure S1

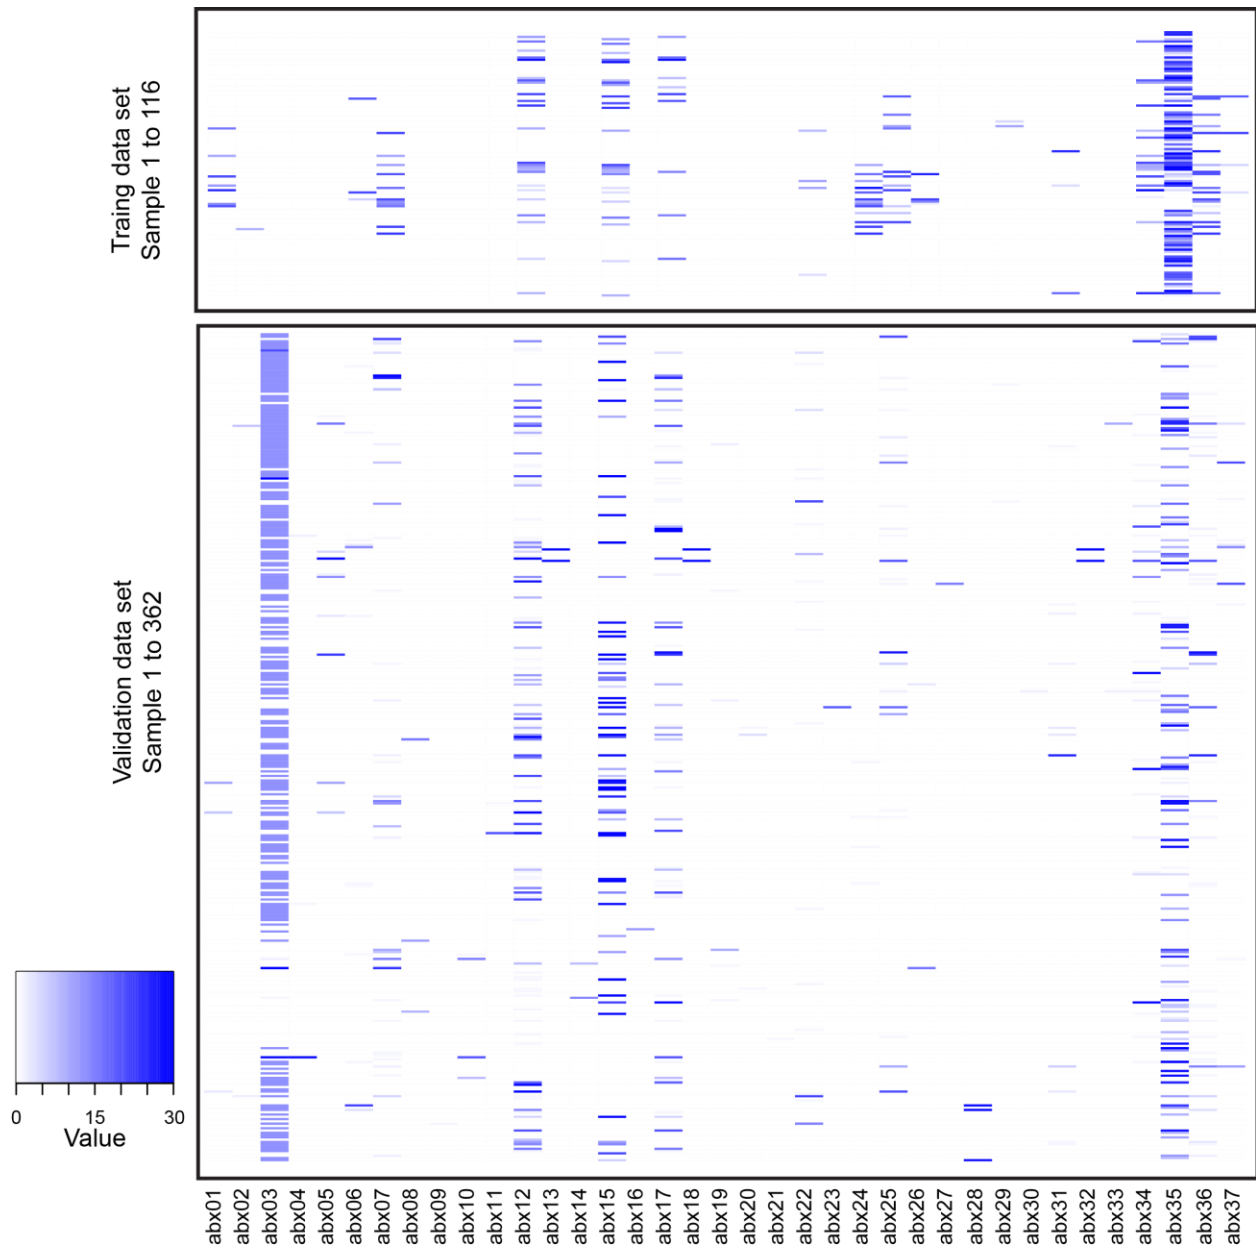

**Figure S1.** Antibiotic exposure associated with sputum samples in the training (A; n=116) and validation (B; n=362) data sets. In the heat maps, each row represents a sputum sample and each column represents a different antibiotic. A total of 16 antibiotics were associated with samples in the training set and 37 antibiotics were applied in the validation data set. The color intensity of individual cells represents the number of days (1-30) that the antibiotic was applied during the 30 days prior to sample collection.

**Figure S2**

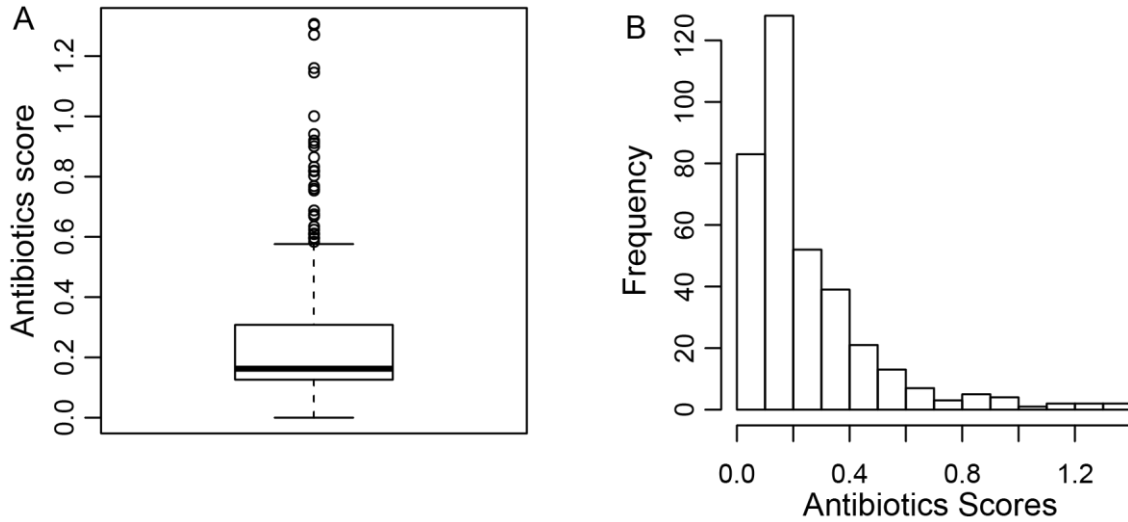

**Figure S2.** Distribution and frequency of antibiotics weighting scores used in the validation data set. Panel A shows the distribution of the antibiotics weighting scores in the validation data set used in the multivariate model. Top and bottom boundaries of the box indicate 75<sup>th</sup> and 25<sup>th</sup> quartile values, respectively, and black lines inside the box represent the 50<sup>th</sup> quartile (median) value. Ends of the whiskers mark the lowest and highest antibiotic weighting scores within 1.5 times the interquartile range. Panel B shows the frequency of the antibiotics weighting scores.

**Table S1.** Daily weight values for *wcB* corresponding to Figure 1B and Equation 2.

| Days to sampling | i used in Equation 2 | Equal Weights | Increasing Weights |         |        |
|------------------|----------------------|---------------|--------------------|---------|--------|
|                  |                      |               | Linear             | Concave | Convex |
| 30               | 1                    | 0.0333        | 0.0022             | 0.0000  | 0.0001 |
| 29               | 2                    | 0.0333        | 0.0043             | 0.0093  | 0.0004 |
| 28               | 3                    | 0.0333        | 0.0065             | 0.0147  | 0.0010 |
| 27               | 4                    | 0.0333        | 0.0086             | 0.0186  | 0.0017 |
| 26               | 5                    | 0.0333        | 0.0108             | 0.0216  | 0.0026 |
| 25               | 6                    | 0.0333        | 0.0129             | 0.0240  | 0.0038 |
| 24               | 7                    | 0.0333        | 0.0151             | 0.0261  | 0.0052 |
| 23               | 8                    | 0.0333        | 0.0172             | 0.0279  | 0.0068 |
| 22               | 9                    | 0.0333        | 0.0194             | 0.0294  | 0.0086 |
| 21               | 10                   | 0.0333        | 0.0215             | 0.0308  | 0.0106 |
| 20               | 11                   | 0.0333        | 0.0237             | 0.0321  | 0.0128 |
| 19               | 12                   | 0.0333        | 0.0258             | 0.0333  | 0.0152 |
| 18               | 13                   | 0.0333        | 0.0280             | 0.0344  | 0.0179 |
| 17               | 14                   | 0.0333        | 0.0301             | 0.0353  | 0.0207 |
| 16               | 15                   | 0.0333        | 0.0323             | 0.0363  | 0.0238 |
| 15               | 16                   | 0.0333        | 0.0344             | 0.0371  | 0.0271 |
| 14               | 17                   | 0.0333        | 0.0366             | 0.0379  | 0.0306 |
| 13               | 18                   | 0.0333        | 0.0387             | 0.0387  | 0.0343 |
| 12               | 19                   | 0.0333        | 0.0409             | 0.0394  | 0.0382 |
| 11               | 20                   | 0.0333        | 0.0430             | 0.0401  | 0.0423 |
| 10               | 21                   | 0.0333        | 0.0452             | 0.0408  | 0.0466 |
| 9                | 22                   | 0.0333        | 0.0473             | 0.0414  | 0.0512 |
| 8                | 23                   | 0.0333        | 0.0495             | 0.0420  | 0.0559 |
| 7                | 24                   | 0.0333        | 0.0516             | 0.0426  | 0.0609 |
| 6                | 25                   | 0.0333        | 0.0538             | 0.0431  | 0.0661 |
| 5                | 26                   | 0.0333        | 0.0559             | 0.0436  | 0.0715 |
| 4                | 27                   | 0.0333        | 0.0581             | 0.0441  | 0.0771 |
| 3                | 28                   | 0.0333        | 0.0602             | 0.0446  | 0.0829 |
| 2                | 29                   | 0.0333        | 0.0624             | 0.0451  | 0.0889 |
| 1                | 30                   | 0.0333        | 0.0645             | 0.0456  | 0.0952 |

**Table S2.** Linear mixed model results for four *wcB* profiles (equal weights, and linear, concave or convex increasing weights) and the two modeling cohorts (training and validation). AIC values can be appropriately compared across models fit to the same cohort.

| <i>wcB</i> weights | Training Set |          |              |       |                  | Validation Set |          |              |       |                  | Bootstrap Averages |           |
|--------------------|--------------|----------|--------------|-------|------------------|----------------|----------|--------------|-------|------------------|--------------------|-----------|
|                    | AIC          | AIC Rank | Coefficients |       |                  | AIC            | AIC Rank | Coefficients |       |                  | AIC Rank           | % Rank #1 |
|                    |              |          | Antibiotics  | Age   | FEV <sub>1</sub> |                |          | Antibiotics  | Age   | FEV <sub>1</sub> |                    |           |
| Equal              | 469.79       | 4        | -0.49        | -0.01 | 0.03             | 1673.23        | 4        | -0.45        | -0.03 | 0.04             | 3.44               | 16%       |
| Linear             | 467.91       | 2        | -0.50        | -0.01 | 0.03             | 1671.80        | 2        | -0.46        | -0.03 | 0.04             | 2.05               | 9%        |
| Concave            | 468.64       | 3        | -0.50        | -0.01 | 0.03             | 1672.59        | 3        | -0.45        | -0.03 | 0.04             | 2.90               | <1%       |
| Convex             | 467.67       | 1        | -0.48        | -0.01 | 0.03             | 1671.23        | 1        | -0.45        | -0.02 | 0.04             | 1.62               | 75%       |

**Table S3.** Characteristics and models for the individual antibiotics in the combined data set

| Antibiotics Names             | Route   | Class          | AIC     | AIC Rank | Coefficient | Coefficient Rank | Summed Rank | WCC  |
|-------------------------------|---------|----------------|---------|----------|-------------|------------------|-------------|------|
| Levofloxacin                  | IV      | Quinolone      | 2139.20 | 2        | -32.532     | 1                | 3           | 0.5  |
| Amoxicillin/Clavulanate       | oral    | Beta-lactam    | 2141.49 | 7        | -12.816     | 3                | 10          | 0.5  |
| Imipenem                      | IV      | Beta-lactam    | 2141.44 | 6        | -12.509     | 4                | 10          | 0.5  |
| Nafcillin                     | IV      | Beta-lactam    | 2141.49 | 8        | -12.876     | 2                | 10          | 0.5  |
| Colistin                      | IV      | Polypeptide    | 2140.71 | 3        | -2.0398     | 9                | 12          | 0.5  |
| Meropenem                     | IV      | Beta-lactam    | 2140.95 | 4        | -1.7425     | 11               | 15          | 0.5  |
| Cefepime                      | IV      | Beta-lactam    | 2143.45 | 11       | -3.8783     | 5                | 16          | 0.5  |
| Tobramycin                    | IV      | Aminoglycoside | 2141.01 | 5        | -1.6468     | 12               | 17          | 0.5  |
| Ciprofloxacin                 | IV      | Quinolone      | 2143.67 | 12       | -2.7239     | 6                | 18          | 0.5  |
| Minocycline                   | IV      | Tetracycline   | 2144.26 | 14       | -2.2355     | 8                | 22          | 0.5  |
| Cefuroxime                    | oral    | Beta-lactam    | 2144.79 | 16       | -2.4559     | 7                | 23          | 0.5  |
| Ciprofloxacin                 | oral    | Quinolone      | 2143.21 | 10       | -1.1239     | 20               | 30          | 0.5  |
| Minocycline                   | oral    | Tetracycline   | 2145.24 | 20       | -1.7971     | 10               | 30          | 0.33 |
| Chloramphenicol               | IV      | Other          | 2144.00 | 13       | -1.1332     | 19               | 32          | 0.33 |
| Linezolid                     | oral    | Oxazolidonone  | 2145.08 | 18       | -1.594      | 14               | 32          | 0.33 |
| Levofloxacin                  | oral    | Quinolone      | 2145.61 | 24       | -1.639      | 13               | 37          | 0.33 |
| Cephalexin                    | oral    | Beta-lactam    | 2133.45 | 1        | 64.179      | 37               | 38          | 0.33 |
| Vancomycin                    | IV      | Glycopeptide   | 2145.69 | 25       | -1.4934     | 15               | 40          | 0.33 |
| sulfamethoxazole/trimethoprim | IV      | Sulfonamide    | 2145.21 | 19       | -0.9431     | 22               | 41          | 0.33 |
| Ceftazidime                   | IV      | Beta-lactam    | 2145.75 | 26       | -1.225      | 17               | 43          | 0.33 |
| Piperacillin/Tazobactam       | IV      | Beta-lactam    | 2145.84 | 27       | -1.4511     | 16               | 43          | 0.33 |
| Moxifloxacin                  | oral    | Quinolone      | 2144.66 | 15       | -0.1825     | 28               | 43          | 0.33 |
| Gentamicin                    | IV      | Aminoglycoside | 2142.05 | 9        | 9.27658     | 36               | 45          | 0.33 |
| Amikacin                      | IV      | Aminoglycoside | 2146.20 | 31       | -1.1528     | 18               | 49          | 0.33 |
| Doxycycline                   | oral    | Tetracycline   | 2145.84 | 28       | -0.9521     | 21               | 49          | 0.33 |
| Clindamycin                   | oral    | Lincosamide    | 2144.83 | 17       | 2.43332     | 35               | 52          | 0.17 |
| Aztreonam                     | inhaled | Beta-lactam    | 2146.04 | 30       | -0.6754     | 23               | 53          | 0.17 |

|                               |         |                |         |    |         |    |    |      |
|-------------------------------|---------|----------------|---------|----|---------|----|----|------|
| Rifabutin                     | oral    | Other          | 2145.39 | 21 | 1.76664 | 32 | 53 | 0.17 |
| Ethambutol                    | oral    | Other          | 2145.39 | 22 | 1.76664 | 33 | 55 | 0.17 |
| Linezolid                     | IV      | Oxazolidonone  | 2145.97 | 29 | -0.3367 | 27 | 56 | 0.17 |
| Azithromycin                  | oral    | Macrolide      | 2146.78 | 33 | -0.5216 | 24 | 57 | 0.17 |
| Clarithromycin                | oral    | Macrolide      | 2145.39 | 23 | 1.76664 | 34 | 57 | 0.17 |
| Tobramycin                    | inhaled | Aminoglycoside | 2146.96 | 34 | -0.5138 | 25 | 59 | 0.17 |
| sulfamethoxazole/trimethoprim | oral    | Sulfonamide    | 2148.06 | 36 | -0.4302 | 26 | 62 | 0.17 |
| Metronidazole                 | oral    | Other          | 2146.44 | 32 | 0.69447 | 31 | 63 | 0.17 |
| Aztreonam                     | IV      | Beta-lactam    | 2147.42 | 35 | 0.05573 | 29 | 64 | 0.17 |
| Colistin                      | inhaled | Polypeptide    | 2149.07 | 37 | 0.20011 | 30 | 67 | 0.17 |
